# Supplementary material for: Observational cohort study of changing trends in non-invasive ventilation in very preterm infants and associations with clinical outcomes
Source: HighWire-hosted journal article supplement (doi:10.1136/archdischild-2021-322390), 2021-08-19

## Observational cohort study of changing trends in non-invasive respiratory ventilation in very preterm infants and associations with clinical outcomes

Laura Sand<sup>a</sup>, BMBS, Lisa Szatkowski<sup>a</sup>, PhD, T'ng Chang Kwok<sup>a</sup>, BMBS, Don Sharkey<sup>a</sup>, PhD, David Todd<sup>b</sup>, PhD, Helen Budge<sup>a</sup>, PhD, Shalini Ojha<sup>a,c</sup>, PhD

### Supplementary information Table 1 online only: List of variables extracted from the National Neonatal Research Database (NNRD) and the ICD-10 codes used to identify congenital anomaly exclusions and number of babies excluded and definitions of exposure and clinical outcomes

| List of variables extracted from NNRD |                                                                                                                                                                                                                                                                                                                                                                                                                                                                                                                                                                                                                                                                                                                                                                                                                                                                                                                                                                                                                                                                                                                                                                                                                                                                                                                                                                                                                                                                                                                                                                                                                                                                                                                                                                                                                                                                                                                                                                                                                                                  |
|---------------------------------------|--------------------------------------------------------------------------------------------------------------------------------------------------------------------------------------------------------------------------------------------------------------------------------------------------------------------------------------------------------------------------------------------------------------------------------------------------------------------------------------------------------------------------------------------------------------------------------------------------------------------------------------------------------------------------------------------------------------------------------------------------------------------------------------------------------------------------------------------------------------------------------------------------------------------------------------------------------------------------------------------------------------------------------------------------------------------------------------------------------------------------------------------------------------------------------------------------------------------------------------------------------------------------------------------------------------------------------------------------------------------------------------------------------------------------------------------------------------------------------------------------------------------------------------------------------------------------------------------------------------------------------------------------------------------------------------------------------------------------------------------------------------------------------------------------------------------------------------------------------------------------------------------------------------------------------------------------------------------------------------------------------------------------------------------------|
| <i>Baseline Characteristics</i>       | <ul style="list-style-type: none"> <li>- Gestational age was determined using the variables "GestationWeeks" and "GestationDays"</li> <li>- Birth weight was determined using the variable "Birthweight"</li> <li>- Female sex was determined using the variable "Gender"</li> <li>- Multiplicity was determined using the variable "Fetus number"</li> <li>- Any antenatal steroid given was determined using the variable "Antenatal steroids given" and "Steroids antenatal courses"</li> <li>- Caesarean delivery was determined using the variable "Mode of delivery", caesarean section being emergency caesarean section- not in labour, emergency caesarean section – in labour, elective section – not in labour, elective section – in labour</li> <li>- Prolonged rupture of membranes (&gt;18 hours) was determined using the variable "Rupture of membranes"</li> <li>- Surfactant given was determined using the variable "Surfactant given at resuscitation" and "Day surfactant given"</li> </ul>                                                                                                                                                                                                                                                                                                                                                                                                                                                                                                                                                                                                                                                                                                                                                                                                                                                                                                                                                                                                                                |
| <i>Outcomes</i>                       | <ul style="list-style-type: none"> <li>- CLD was determined using the variables "Respiratory support", "AddedO2", "Ventilation mode", "NonInvasiveRespiratoryS" and "Daydateanon"</li> <li>- Death before discharge was determined using the variables "Dateofdeath" and "Deathagemin"</li> <li>- Composite Outcome was determined by CLD or death at 36 weeks' gestation</li> <li>- Sepsis was determined by use of antibiotics for <math>\geq 5</math> consecutive days using the variables "drugsday" and searching for "penicillin, flucloxacillin, amoxicillin, gentamicin, metronidazole, meropenem, cephalosporin (cefotaxime, ceftazidime, cefradine, ceftriaxone) and vancomycin; determined that antibiotic was used for <math>\geq 5</math> consecutive days by using the variable "dayoflife"</li> <li>- Early sepsis was determined by the use of <math>\geq 5</math> consecutive days antibiotics in the first seven days of life</li> <li>- Late sepsis was determined by the use of <math>\geq 5</math> consecutive days antibiotics after 7 days of life</li> <li>- Medical NEC was determined by the variable "necreatment" coded medically for <math>\geq 5</math> consecutive days</li> <li>- Surgical NEC was determined by the variable "necreatment" coded as surgical</li> <li>- Surgical PDA was determined using the variable "treatmentforpda" and searching for 'ligation' or 'ligature' or 'closure of PDA/ patent ductus arteriosus' or 'open correction of PDA' or 'percutaneous transluminal prosthetic occlusion of PDA' on "principleproceduresduringstay", "principlediagnosisatdischarge" and "diagnosisatadmission"</li> <li>- IVH (Grade 3 or 4) was determined using data from cranial ultrasound variable "rightivh" and "leftivh" (looking for grade 3 and 4) and searching for 'ivh grade 3' and 'ivh grade 4' and 'large intraventricular haemorrhage' and 'intraventricular haemorrhage/ parenchymal haemorrhage' in variables "diagnosisatadmission" and "principaldiagnosisatdischarge"</li> </ul> |

|                                                                                                                                                                                                                                                                                                                                                                                                                                                              |                                                                                                                                                                                                                                                                                                                                                                                                                                                                                                                                                                                                                                                                                                                                                                                                                                                                                                                                                                                                                                                                                                                                                                                                                                                                                                                                                                                                                                                               |                                    |
|--------------------------------------------------------------------------------------------------------------------------------------------------------------------------------------------------------------------------------------------------------------------------------------------------------------------------------------------------------------------------------------------------------------------------------------------------------------|---------------------------------------------------------------------------------------------------------------------------------------------------------------------------------------------------------------------------------------------------------------------------------------------------------------------------------------------------------------------------------------------------------------------------------------------------------------------------------------------------------------------------------------------------------------------------------------------------------------------------------------------------------------------------------------------------------------------------------------------------------------------------------------------------------------------------------------------------------------------------------------------------------------------------------------------------------------------------------------------------------------------------------------------------------------------------------------------------------------------------------------------------------------------------------------------------------------------------------------------------------------------------------------------------------------------------------------------------------------------------------------------------------------------------------------------------------------|------------------------------------|
|                                                                                                                                                                                                                                                                                                                                                                                                                                                              | <ul style="list-style-type: none"><li>- PVL was determined using data from cranial ultrasound variable “pvl” and searching for ‘cystic periventricular leucomalacia’ and ‘pvl’ and ‘periventricular leucomalacia’ in variables “diagnosisatadmission” and “principaldiagnosisatdischarge”</li><li>- ROP was determined using variables “principleproceduresduringstay” and requiring VEGF and/or laser treatment</li><li>- Pneumothorax was determined by searching ‘pneumothorax’ in variables “diagnosisatadmission” and “principaldiagnosisatdischarge”</li><li>- Postnatal steroid was determined by the use of steroids (dexamethasone &gt;3 days, hydrocortisone &gt;7 days, methylprednisolone &gt;3 days and prednisolone &gt;7 days) using variables “drugsday” and “dayoflife”</li><li>- Invasive ventilation was determined by using variables “ventilationmode” and “respiratorysupport”</li><li>- Number of days of invasive ventilation was determined using variables “ventilationmode” and “respiratorysupport” and “dayoflife”</li><li>- Number of non-invasive ventilation days was determined using variables “respiratorysupport” and “noninvasiverespiratorysupport” and “dayoflife”</li><li>- Time to first oral feed given was determined using variables “dayenteralfed” and “formulaname” and “dayoflife”</li><li>- Number of days on the neonatal unit was determined using variables “dischtimeanon” and “admittimeanon”</li></ul> |                                    |
| <b>Infants excluded due to missing information</b>                                                                                                                                                                                                                                                                                                                                                                                                           |                                                                                                                                                                                                                                                                                                                                                                                                                                                                                                                                                                                                                                                                                                                                                                                                                                                                                                                                                                                                                                                                                                                                                                                                                                                                                                                                                                                                                                                               |                                    |
| Infant were excluded in there was missing information oon gestational age (GA), birthweight or sex. Where contradictory data were recorded, the entry at the first admission was selected. Infants recorded as born at <22 weeks’ gestation, of birthweight for GA z-score >4, or <-4, standard deviations (SD), as admitted >12 hours after birth, had missing records of ≥1 days or had congenital anomalies that impact respiratory support listed below. |                                                                                                                                                                                                                                                                                                                                                                                                                                                                                                                                                                                                                                                                                                                                                                                                                                                                                                                                                                                                                                                                                                                                                                                                                                                                                                                                                                                                                                                               |                                    |
| <b>ICD-10 codes used to identify congenital anomaly exclusions and number of babies excluded</b>                                                                                                                                                                                                                                                                                                                                                             |                                                                                                                                                                                                                                                                                                                                                                                                                                                                                                                                                                                                                                                                                                                                                                                                                                                                                                                                                                                                                                                                                                                                                                                                                                                                                                                                                                                                                                                               |                                    |
| <b>ICD-10 code</b>                                                                                                                                                                                                                                                                                                                                                                                                                                           | <b>Anomaly</b>                                                                                                                                                                                                                                                                                                                                                                                                                                                                                                                                                                                                                                                                                                                                                                                                                                                                                                                                                                                                                                                                                                                                                                                                                                                                                                                                                                                                                                                | <b>Number excluded<sup>a</sup></b> |
| Q00                                                                                                                                                                                                                                                                                                                                                                                                                                                          | Anencephaly and similar malformations                                                                                                                                                                                                                                                                                                                                                                                                                                                                                                                                                                                                                                                                                                                                                                                                                                                                                                                                                                                                                                                                                                                                                                                                                                                                                                                                                                                                                         |                                    |
| Q01                                                                                                                                                                                                                                                                                                                                                                                                                                                          | Encephalocele and similar malformations                                                                                                                                                                                                                                                                                                                                                                                                                                                                                                                                                                                                                                                                                                                                                                                                                                                                                                                                                                                                                                                                                                                                                                                                                                                                                                                                                                                                                       | 8                                  |
| Q05                                                                                                                                                                                                                                                                                                                                                                                                                                                          | Spina bifida and similar malformations                                                                                                                                                                                                                                                                                                                                                                                                                                                                                                                                                                                                                                                                                                                                                                                                                                                                                                                                                                                                                                                                                                                                                                                                                                                                                                                                                                                                                        | 27                                 |
| Q20                                                                                                                                                                                                                                                                                                                                                                                                                                                          | Congenital malformations of cardiac chambers and connections                                                                                                                                                                                                                                                                                                                                                                                                                                                                                                                                                                                                                                                                                                                                                                                                                                                                                                                                                                                                                                                                                                                                                                                                                                                                                                                                                                                                  | 133                                |
| Q21.2                                                                                                                                                                                                                                                                                                                                                                                                                                                        | Atrioventricular septal defect (AVSD)                                                                                                                                                                                                                                                                                                                                                                                                                                                                                                                                                                                                                                                                                                                                                                                                                                                                                                                                                                                                                                                                                                                                                                                                                                                                                                                                                                                                                         | 70                                 |
| Q21.3                                                                                                                                                                                                                                                                                                                                                                                                                                                        | Tetralogy of Fallot                                                                                                                                                                                                                                                                                                                                                                                                                                                                                                                                                                                                                                                                                                                                                                                                                                                                                                                                                                                                                                                                                                                                                                                                                                                                                                                                                                                                                                           | 73                                 |
| Q21.91                                                                                                                                                                                                                                                                                                                                                                                                                                                       | Single atrium                                                                                                                                                                                                                                                                                                                                                                                                                                                                                                                                                                                                                                                                                                                                                                                                                                                                                                                                                                                                                                                                                                                                                                                                                                                                                                                                                                                                                                                 |                                    |
| Q21.92                                                                                                                                                                                                                                                                                                                                                                                                                                                       | Single ventricle                                                                                                                                                                                                                                                                                                                                                                                                                                                                                                                                                                                                                                                                                                                                                                                                                                                                                                                                                                                                                                                                                                                                                                                                                                                                                                                                                                                                                                              |                                    |
| Q22                                                                                                                                                                                                                                                                                                                                                                                                                                                          | Congenital malformations of pulmonary and tricuspid valves                                                                                                                                                                                                                                                                                                                                                                                                                                                                                                                                                                                                                                                                                                                                                                                                                                                                                                                                                                                                                                                                                                                                                                                                                                                                                                                                                                                                    | 236                                |
| Q23                                                                                                                                                                                                                                                                                                                                                                                                                                                          | Congenital malformations of aortic and mitral valves                                                                                                                                                                                                                                                                                                                                                                                                                                                                                                                                                                                                                                                                                                                                                                                                                                                                                                                                                                                                                                                                                                                                                                                                                                                                                                                                                                                                          | 80                                 |
| Q25.1                                                                                                                                                                                                                                                                                                                                                                                                                                                        | Coarctation of aorta                                                                                                                                                                                                                                                                                                                                                                                                                                                                                                                                                                                                                                                                                                                                                                                                                                                                                                                                                                                                                                                                                                                                                                                                                                                                                                                                                                                                                                          | 109                                |
| Q25.2                                                                                                                                                                                                                                                                                                                                                                                                                                                        | Atresia of aorta                                                                                                                                                                                                                                                                                                                                                                                                                                                                                                                                                                                                                                                                                                                                                                                                                                                                                                                                                                                                                                                                                                                                                                                                                                                                                                                                                                                                                                              |                                    |
| Q25.3                                                                                                                                                                                                                                                                                                                                                                                                                                                        | Stenosis of aorta (AS)                                                                                                                                                                                                                                                                                                                                                                                                                                                                                                                                                                                                                                                                                                                                                                                                                                                                                                                                                                                                                                                                                                                                                                                                                                                                                                                                                                                                                                        | 5                                  |
| Q25.4                                                                                                                                                                                                                                                                                                                                                                                                                                                        | Other congenital malformations of aorta                                                                                                                                                                                                                                                                                                                                                                                                                                                                                                                                                                                                                                                                                                                                                                                                                                                                                                                                                                                                                                                                                                                                                                                                                                                                                                                                                                                                                       | 49                                 |
| Q25.5                                                                                                                                                                                                                                                                                                                                                                                                                                                        | Atresia of pulmonary artery                                                                                                                                                                                                                                                                                                                                                                                                                                                                                                                                                                                                                                                                                                                                                                                                                                                                                                                                                                                                                                                                                                                                                                                                                                                                                                                                                                                                                                   | 9                                  |
| Q25.6                                                                                                                                                                                                                                                                                                                                                                                                                                                        | Stenosis of pulmonary artery (PS)                                                                                                                                                                                                                                                                                                                                                                                                                                                                                                                                                                                                                                                                                                                                                                                                                                                                                                                                                                                                                                                                                                                                                                                                                                                                                                                                                                                                                             | 362                                |
| Q25.8                                                                                                                                                                                                                                                                                                                                                                                                                                                        | Other congenital malformations of great arteries                                                                                                                                                                                                                                                                                                                                                                                                                                                                                                                                                                                                                                                                                                                                                                                                                                                                                                                                                                                                                                                                                                                                                                                                                                                                                                                                                                                                              | 2                                  |
| Q26.2                                                                                                                                                                                                                                                                                                                                                                                                                                                        | Total anomalous pulmonary venous connection (TAPVD)                                                                                                                                                                                                                                                                                                                                                                                                                                                                                                                                                                                                                                                                                                                                                                                                                                                                                                                                                                                                                                                                                                                                                                                                                                                                                                                                                                                                           | 12                                 |
| Q30.0                                                                                                                                                                                                                                                                                                                                                                                                                                                        | Choanal atresia                                                                                                                                                                                                                                                                                                                                                                                                                                                                                                                                                                                                                                                                                                                                                                                                                                                                                                                                                                                                                                                                                                                                                                                                                                                                                                                                                                                                                                               | 30                                 |
| Q32                                                                                                                                                                                                                                                                                                                                                                                                                                                          | Congenital malformations of trachea and bronchus                                                                                                                                                                                                                                                                                                                                                                                                                                                                                                                                                                                                                                                                                                                                                                                                                                                                                                                                                                                                                                                                                                                                                                                                                                                                                                                                                                                                              | 102                                |
| Q33.0                                                                                                                                                                                                                                                                                                                                                                                                                                                        | Congenital cystic lung                                                                                                                                                                                                                                                                                                                                                                                                                                                                                                                                                                                                                                                                                                                                                                                                                                                                                                                                                                                                                                                                                                                                                                                                                                                                                                                                                                                                                                        | 45                                 |
| Q33.2                                                                                                                                                                                                                                                                                                                                                                                                                                                        | Sequestration of lung                                                                                                                                                                                                                                                                                                                                                                                                                                                                                                                                                                                                                                                                                                                                                                                                                                                                                                                                                                                                                                                                                                                                                                                                                                                                                                                                                                                                                                         | 6                                  |
| Q33.3                                                                                                                                                                                                                                                                                                                                                                                                                                                        | Agenesis of lung                                                                                                                                                                                                                                                                                                                                                                                                                                                                                                                                                                                                                                                                                                                                                                                                                                                                                                                                                                                                                                                                                                                                                                                                                                                                                                                                                                                                                                              |                                    |
| Q33.4                                                                                                                                                                                                                                                                                                                                                                                                                                                        | Congenital bronchiectasis                                                                                                                                                                                                                                                                                                                                                                                                                                                                                                                                                                                                                                                                                                                                                                                                                                                                                                                                                                                                                                                                                                                                                                                                                                                                                                                                                                                                                                     |                                    |
| Q33.5                                                                                                                                                                                                                                                                                                                                                                                                                                                        | Ectopic tissue in lung                                                                                                                                                                                                                                                                                                                                                                                                                                                                                                                                                                                                                                                                                                                                                                                                                                                                                                                                                                                                                                                                                                                                                                                                                                                                                                                                                                                                                                        |                                    |

|                                                                                                                                                                                                                                                                                                                                                                                  |                                                                                                                                          |                                                                                 |
|----------------------------------------------------------------------------------------------------------------------------------------------------------------------------------------------------------------------------------------------------------------------------------------------------------------------------------------------------------------------------------|------------------------------------------------------------------------------------------------------------------------------------------|---------------------------------------------------------------------------------|
| Q33.6                                                                                                                                                                                                                                                                                                                                                                            | Hypoplasia and dysplasia of lung                                                                                                         | 16                                                                              |
| Q34.0                                                                                                                                                                                                                                                                                                                                                                            | Anomaly of pleura                                                                                                                        |                                                                                 |
| Q34.1                                                                                                                                                                                                                                                                                                                                                                            | Congenital cyst of mediastinum                                                                                                           |                                                                                 |
| Q34.8                                                                                                                                                                                                                                                                                                                                                                            | Other specified congenital malformations of respiratory system                                                                           |                                                                                 |
| Q35/Q36/Q37                                                                                                                                                                                                                                                                                                                                                                      | Cleft lip and/or palate                                                                                                                  | 202                                                                             |
| Q39                                                                                                                                                                                                                                                                                                                                                                              | Oesophageal atresia                                                                                                                      | 104                                                                             |
| Q41                                                                                                                                                                                                                                                                                                                                                                              | Congenital absence, atresia and stenosis of small intestine                                                                              | 15                                                                              |
| Q42                                                                                                                                                                                                                                                                                                                                                                              | Congenital absence, atresia and stenosis of large intestine                                                                              | 41                                                                              |
| Q60.1                                                                                                                                                                                                                                                                                                                                                                            | Bilateral renal agenesis                                                                                                                 | 3                                                                               |
| Q60.6                                                                                                                                                                                                                                                                                                                                                                            | Potter's syndrome                                                                                                                        | 4                                                                               |
| Q61.1                                                                                                                                                                                                                                                                                                                                                                            | Polycystic kidney, infantile type                                                                                                        | 6                                                                               |
| Q61.2                                                                                                                                                                                                                                                                                                                                                                            | Polycystic kidney, adult type                                                                                                            | 1                                                                               |
| Q64.1                                                                                                                                                                                                                                                                                                                                                                            | Exstrophy of urinary bladder                                                                                                             | 2                                                                               |
| Q64.2                                                                                                                                                                                                                                                                                                                                                                            | Posterior urethral valves (PUV)                                                                                                          | 25                                                                              |
| Q64.5                                                                                                                                                                                                                                                                                                                                                                            | Congenital absence of bladder and urethra                                                                                                | 1                                                                               |
| Q77.1                                                                                                                                                                                                                                                                                                                                                                            | Thanatophoric short stature                                                                                                              |                                                                                 |
| Q79.0                                                                                                                                                                                                                                                                                                                                                                            | Congenital diaphragmatic hernia                                                                                                          | 75                                                                              |
| Q79.1                                                                                                                                                                                                                                                                                                                                                                            | Eventration of diaphragmatic hernia                                                                                                      | 18                                                                              |
| Q79.2                                                                                                                                                                                                                                                                                                                                                                            | Exomphalos                                                                                                                               | 66                                                                              |
| Q79.3                                                                                                                                                                                                                                                                                                                                                                            | Gastroschisis                                                                                                                            | 50                                                                              |
| Q90                                                                                                                                                                                                                                                                                                                                                                              | Down's syndrome                                                                                                                          | 171                                                                             |
| Q91                                                                                                                                                                                                                                                                                                                                                                              | Edwards' syndrome and Patau's syndrome                                                                                                   | 42                                                                              |
| aSum exceeds total number of exclusions as some infants had more than one anomaly                                                                                                                                                                                                                                                                                                |                                                                                                                                          |                                                                                 |
| <b>Definition of exposure to non-invasive ventilation (NIV)</b>                                                                                                                                                                                                                                                                                                                  |                                                                                                                                          |                                                                                 |
| From variables that record types of respiratory support received (invasive ventilation, NIV, supplemental oxygen, type of NIV), we first identified babies who received any NIV. Those who did not receive any respiratory support, had only mechanical ventilation and/or supplemental oxygen, or where information was not available to discern the type of NIV were excluded. |                                                                                                                                          |                                                                                 |
| <b>HFNC group:</b> those who received HFNC for any length of time. Infants in the HFNC group may have received CPAP also.                                                                                                                                                                                                                                                        |                                                                                                                                          | <b>CPAP group:</b> those who received CPAP and had no record of receiving HFNC. |
| <b>Definition of clinical outcomes*</b>                                                                                                                                                                                                                                                                                                                                          |                                                                                                                                          |                                                                                 |
| <b>Bronchopulmonary dysplasia (BPD)</b>                                                                                                                                                                                                                                                                                                                                          | Infant requiring any supplementary oxygen or respiratory support at 36 weeks' CGA (infants who died before 36 weeks were excluded) [9]   |                                                                                 |
| <b>Death before discharge</b>                                                                                                                                                                                                                                                                                                                                                    | Infant death prior to discharge from neonatal care                                                                                       |                                                                                 |
| <b>Late onset sepsis (LOS)</b>                                                                                                                                                                                                                                                                                                                                                   | recorded diagnosis with either a positive blood culture or antibiotic given for ≥5 consecutive days) after 72 hours of life              |                                                                                 |
| <b>Necrotising enterocolitis (NEC)</b>                                                                                                                                                                                                                                                                                                                                           | recorded diagnosis of confirmed NEC); surgical NEC (NEC treatment coded as surgical                                                      |                                                                                 |
| <b>Patent ductus arteriosus (PDA)</b>                                                                                                                                                                                                                                                                                                                                            | Recorded diagnosis of PDA requiring surgical closure                                                                                     |                                                                                 |
| <b>Retinopathy of prematurity (ROP)</b>                                                                                                                                                                                                                                                                                                                                          | Recorded diagnosis of ROP requiring vascular endothelial growth factor or laser treatment                                                |                                                                                 |
| <b>Pneumothorax</b>                                                                                                                                                                                                                                                                                                                                                              | Recorded diagnosis of pneumothorax                                                                                                       |                                                                                 |
| <b>Postnatal steroid administration</b>                                                                                                                                                                                                                                                                                                                                          | Record of infant having received dexamethasone > 3 days, hydrocortisone > 7 days, methylprednisolone > 3 days or prednisolone > 7 days); |                                                                                 |
| <b>Number of days of non-invasive ventilation</b>                                                                                                                                                                                                                                                                                                                                | Number of days of care where infants was recorded as having received any form of NIV                                                     |                                                                                 |
| <b>Number of days of non-respiratory support</b>                                                                                                                                                                                                                                                                                                                                 | Number of days of care where infants was recorded as having received any respiratory support                                             |                                                                                 |
| <b>Number of days spent in neonatal care</b>                                                                                                                                                                                                                                                                                                                                     | Total number of days infant remained in neonatal care including stay in all neonatal units they were cared for in.                       |                                                                                 |
| *Code lists are available from the authors on request.                                                                                                                                                                                                                                                                                                                           |                                                                                                                                          |                                                                                 |

**Supplementary information Table 2.** Characteristics of infants who received NIV with HFNC or with CPAP only from 2010 to 2017 in England and Wales, by gestational age group.

|                                                                                  | All infants       | HFNC              | CPAP only         | P      |
|----------------------------------------------------------------------------------|-------------------|-------------------|-------------------|--------|
| <b>Gestational age &lt;28 weeks</b>                                              | <b>n = 13,841</b> | <b>n = 10,734</b> | <b>n = 3,107</b>  |        |
| Gestational age (weeks, median (IQR))                                            | 26 (25-27)        | 26 (25-27)        | 26 (25-27)        | <0.001 |
| Birth weight (grams, median (IQR))                                               | 850 (710-989)     | 842 (705-980)     | 860 (720-1000)    | <0.001 |
| Birth weight z-score (mean ( $\pm$ SD)) <sup>a</sup>                             | -0.11 (0.86)      | -0.12 (0.86)      | -0.07 (0.85)      | 0.002  |
| Female sex, n (%)                                                                | 6,543 (47.3)      | 5,068 (47.2)      | 1,475 (47.5)      | 0.799  |
| Multiple birth, n (%)                                                            | 3,339 (24.1)      | 2,542 (23.7)      | 797 (25.7)        | 0.024  |
| Any antenatal steroid given, n (%) <sup>a</sup>                                  | 12,497 (90.3)     | 9,731 (90.7)      | 2,766 (89.0)      | 0.002  |
| Caesarean delivery, n (%) <sup>a</sup>                                           | 5,605 (40.5)      | 4,404 (41.0)      | 1,201 (38.7)      | 0.008  |
| Rupture of membranes (>18 hours), n (%)                                          | 3,813 (27.5)      | 2,940 (27.4)      | 873 (28.1)        | 0.436  |
| Surfactant given, n (%) <sup>a</sup>                                             | 12,203 (88.2)     | 9,311 (86.7)      | 2,892 (93.1)      | <0.001 |
| Mechanical ventilation prior to non-invasive ventilation, n (%)                  | 10,781 (77.9)     | 8,362 (77.9)      | 2,419 (77.9)      | 0.957  |
| NMR-2000 score, categorised as risk of in-hospital mortality, n (%) <sup>a</sup> |                   |                   |                   |        |
| Low risk                                                                         | 0 (0)             | 0 (0)             | 0 (0)             |        |
| Medium risk                                                                      | 9,713 (70.2)      | 7,555 (70.4)      | 2,158 (69.5)      | 0.010  |
| High risk                                                                        | 2,686 (19.4)      | 2,105 (19.6)      | 581 (18.7)        |        |
| <b>Gestational age 28-31 weeks</b>                                               | <b>n = 32,021</b> | <b>n = 16,202</b> | <b>n = 15,819</b> |        |
| Gestational age (weeks, median (IQR))                                            | 30 (29-31)        | 29 (28-30)        | 30 (29-31)        | <0.001 |
| Birth weight (grams, median (IQR))                                               | 1,355 (1150-1570) | 1,300 (1090-1518) | 1,410 (1210-1615) | <0.001 |
| Birth weight z-score (mean ( $\pm$ SD))                                          | -0.04 (1.00)      | -0.12 (1.05)      | 0.05 (0.94)       | <0.001 |
| Female sex, n (%)                                                                | 14,340 (44.8)     | 7,103 (43.8)      | 7,237 (45.7)      | 0.001  |
| Multiple birth, n (%)                                                            | 9,041 (28.2)      | 4,511 (27.8)      | 4,530 (28.6)      | 0.114  |
| Any antenatal steroid given, n (%) <sup>b</sup>                                  | 28,612 (89.4)     | 14,585 (90.0)     | 14,027 (88.7)     | <0.001 |
| Caesarean delivery, n (%) <sup>b</sup>                                           | 20,424 (63.8)     | 10,623 (65.6)     | 9,801 (62.0)      | <0.001 |
| Rupture of membranes (>18 hours), n (%)                                          | 7,083 (22.1)      | 3,374 (20.8)      | 3,709 (23.4)      | <0.001 |
| Surfactant given, n (%) <sup>b</sup>                                             | 12,557 (39.2)     | 6,832 (42.2)      | 5,725 (36.2)      | <0.001 |
| Mechanical ventilation prior to non-invasive ventilation, n (%)                  | 9,330 (29.1)      | 5,537 (34.2)      | 3,793 (24.0)      | <0.001 |
| NMR-2000 score, categorised as risk of in-hospital mortality n (%) <sup>b</sup>  |                   |                   |                   |        |
| Low risk                                                                         | 4,047 (12.6)      | 1,677 (10.4)      | 2,370 (15.0)      |        |
| Medium risk                                                                      | 24,094 (75.2)     | 12,656 (78.1)     | 11,438 (72.3)     | <0.001 |
| High risk                                                                        | 533 (1.7)         | 378 (2.3)         | 155 (1.0)         |        |

<sup>a</sup>Missing data amongst babies <28 weeks: birth weight for age z-score, 18 (0.1%); exposure to antenatal steroids, 107 (0.8%); born by Caesarean delivery, 683 (4.9%); surfactant given, 513 (3.7%); NMR-2000 score, 1,442 (10.4%)

<sup>b</sup>Missing data amongst babies 28-31 weeks: exposure to antenatal steroids, 405 (1.3%); born by Caesarean delivery, 1,739 (5.4%); surfactant given, 2,034 (6.4%); NMR-2000 score, 3,347 (10.5%)

**Supplementary information Table 3.** Outcomes in infants born at <28 weeks' gestation who received NIV from 2010 to 2017 in England and Wales: comparison between those who received HFNC vs. those who received CPAP only.

|                                                           | All infants<br>n (%) | HFNC<br>n (%)   | CPAP only<br>n (%) | aOR<br>(95% CI)                     |
|-----------------------------------------------------------|----------------------|-----------------|--------------------|-------------------------------------|
| <b>Dichotomous outcomes, n (%)</b>                        |                      |                 |                    |                                     |
| <b>BPD</b><br><b>n=12,694<sup>a,b</sup></b>               | 9,086<br>(71.6)      | 7,651<br>(74.7) | 1,435<br>(58.5)    | 2.10<br>(1.88 to 2.35) <sup>c</sup> |
| <b>Death before discharge</b><br><b>n=13,841</b>          | 1,153<br>(8.3)       | 498<br>(4.6)    | 655<br>(21.1)      | 0.12<br>(0.10 to 0.14) <sup>c</sup> |
| <b>BPD or death before discharge n = 13,841</b>           | 10,233<br>(73.9)     | 8,144<br>(75.9) | 2,089<br>(67.2)    | 1.51<br>(1.37 to 1.67) <sup>c</sup> |
| <b>Late onset sepsis</b>                                  | 10,060<br>(72.7)     | 7,889<br>(73.5) | 2,171<br>(69.9)    | 1.35<br>(1.22 to 1.49) <sup>c</sup> |
| <b>NEC (confirmed)</b>                                    | 4,336<br>(31.3)      | 3,310<br>(30.8) | 1,026<br>(33.0)    | 0.91<br>(0.83 to 1.00)              |
| <b>NEC requiring surgery</b>                              | 1,031<br>(7.4)       | 765<br>(7.1)    | 266<br>(8.6)       | 0.81<br>(0.69 to 0.96)              |
| <b>PDA requiring surgery</b>                              | 839<br>(6.1)         | 674<br>(6.3)    | 165<br>(5.3)       | 1.80<br>(1.48 to 2.18) <sup>c</sup> |
| <b>IVH (Grade 3/4)</b>                                    | 1,586<br>(11.5)      | 1,194<br>(11.1) | 392<br>(12.6)      | 0.77<br>(0.67 to 0.89) <sup>c</sup> |
| <b>Periventricular leukomalacia</b>                       | 512<br>(3.7)         | 392<br>(3.7)    | 120<br>(3.9)       | 1.00<br>(0.80 to 1.26)              |
| <b>ROP requiring treatment</b>                            | 2,025<br>(14.6)      | 1,802<br>(16.8) | 223<br>(7.2)       | 1.95<br>(1.66 to 2.29) <sup>c</sup> |
| <b>Pneumothorax</b>                                       | 730<br>(5.3)         | 570<br>(5.3)    | 160<br>(5.1)       | 0.94<br>(0.76 to 1.15)              |
| <b>Received postnatal steroids</b>                        | 2,481<br>(17.9)      | 2,087<br>(19.4) | 394<br>(12.7)      | 1.59<br>(1.40 to 1.82) <sup>c</sup> |
| <b>Continuous outcomes, median (IQR)</b>                  |                      |                 |                    |                                     |
| <b>Number of days of invasive ventilation<sup>a</sup></b> | 10 (3-25)            | 10 (3-26)       | 7 (2-19)           | 2.0 (1.3 to 2.7) <sup>c</sup>       |
| <b>Number of days of NIV ventilation<sup>a</sup></b>      | 45 (31-60)           | 47 (34-63)      | 35 (22-47)         | 11.0 (9.9 to 12.1) <sup>c</sup>     |
| <b>Number of days of respiratory support<sup>a</sup></b>  | 78 (53-103)          | 81 (57-105)     | 64 (41-89)         | 17.0 (15.1 to 18.9) <sup>c</sup>    |
| <b>Length of stay (days)<sup>a</sup></b>                  | 92 (76-113)          | 94 (77-115)     | 84 (69-103)        | 11.0 (9.6 to 12.4) <sup>c</sup>     |

Abbreviations: IQR, interquartile range; BPD, bronchopulmonary dysplasia; IVH, intraventricular haemorrhage; NEC, necrotising enterocolitis; ROP, retinopathy of prematurity

aOR, adjusted odds ratio, adjusted for sex, birth weight z-score <-2, exposure to antenatal steroids, NMR-200 category, mechanical ventilation on day 1, year of admission.

<sup>a</sup> excluded infants who died before 36 weeks corrected gestational age

<sup>b</sup> missing observations: BPD, 0; Death before discharge, 4

<sup>c</sup> P< .05 with Bonferroni correction

**Supplementary information Table 4.** Outcomes in infants born at 28-31 weeks' gestation who received NIV from 2010 to 2017 in England and Wales: comparison between those who received any HFNC and those who received CPAP only.

|                                                           | All infants<br>n (%) | HFNC<br>n (%)   | CPAP<br>n (%)   | aOR<br>(95% CI)                     |
|-----------------------------------------------------------|----------------------|-----------------|-----------------|-------------------------------------|
| <b>Dichotomous outcomes, n (%)</b>                        |                      |                 |                 |                                     |
| <b>BPD</b><br><b>n=31,577<sup>a,b</sup></b>               | 6,386<br>(20.2)      | 4,685<br>(29.2) | 1,701<br>(10.9) | 3.42<br>(3.19 to 3.67) <sup>c</sup> |
| <b>Death before discharge</b><br><b>n=32,021</b>          | 445<br>(1.4)         | 180<br>(1.1)    | 265<br>(1.7)    | 0.51<br>(0.41 to 0.64) <sup>c</sup> |
| <b>BPD or death before discharge n=32,021</b>             | 6,830<br>(21.3)      | 4,864<br>(30.0) | 1,701<br>(10.9) | 3.03<br>(2.83 to 3.24) <sup>c</sup> |
| <b>Late onset sepsis</b>                                  | 8,724<br>(27.2)      | 5,345<br>(33.0) | 3,379<br>(21.4) | 1.99<br>(1.88 to 2.11) <sup>c</sup> |
| <b>NEC (confirmed)</b>                                    | 3,775<br>(11.8)      | 2,360<br>(14.6) | 1,415<br>(8.9)  | 1.70<br>(1.57 to 1.84) <sup>c</sup> |
| <b>NEC requiring surgery</b>                              | 448<br>(1.4)         | 300<br>(1.9)    | 148<br>(0.9)    | 2.16<br>(1.73 to 2.69) <sup>c</sup> |
| <b>PDA requiring surgery</b>                              | 97<br>(0.3)          | 77<br>(0.5)     | 20<br>(0.1)     | 4.67<br>(2.79 to 7.81) <sup>c</sup> |
| <b>IVH (Grade 3/4)</b>                                    | 594<br>(1.9)         | 364<br>(2.2)    | 230<br>(1.5)    | 1.32<br>(1.09 to 1.59)              |
| <b>Periventricular leukomalacia</b>                       | 534<br>(1.7)         | 323<br>(2.0)    | 211<br>(1.3)    | 1.41<br>(1.16 to 1.72) <sup>c</sup> |
| <b>ROP requiring treatment</b>                            | 347<br>(1.1)         | 230<br>(1.4)    | 117<br>(0.7)    | 1.30<br>(1.03 to 1.64)              |
| <b>Pneumothorax</b>                                       | 1,185<br>(3.7)       | 767<br>(4.7)    | 418<br>(2.6)    | 1.97<br>(1.72 to 2.25) <sup>c</sup> |
| <b>Received postnatal steroids</b>                        | 388<br>(1.2)         | 313<br>(1.9)    | 75<br>(0.5)     | 3.84<br>(2.90 to 5.10) <sup>c</sup> |
| <b>Continuous outcomes, median (IQR)</b>                  |                      |                 |                 |                                     |
| <b>Number of days of invasive ventilation<sup>a</sup></b> | 1 (0-2)              | 1 (0-3)         | 1 (0-2)         | 0.0 (-8.2 to 8.2)                   |
| <b>Number of days of NIV<sup>a</sup></b>                  | 7 (3-15)             | 10 (5-24)       | 4 (2-8)         | 6.0 (5.8 to 6.2) <sup>c</sup>       |
| <b>Number of days of respiratory support<sup>a</sup></b>  | 10 (4-29)            | 17 (7-42)       | 6 (3-15)        | 8.8 (8.3 to 9.2) <sup>c</sup>       |
| <b>Length of stay (days)<sup>a</sup></b>                  | 46 (36-60)           | 51 (39-66)      | 42 (33-52)      | 8.0 (7.5 to 8.5) <sup>c</sup>       |

Abbreviations: IQR, interquartile range; BPD, bronchopulmonary dysplasia; IVH, intraventricular haemorrhage; NEC, necrotising enterocolitis; ROP, retinopathy of prematurity

aOR, adjusted odds ratio, adjusted for sex, birth weight z-score <-2, exposure to antenatal steroids, NMR-200 category, mechanical ventilation on day 1, year of admission.

<sup>a</sup> excluded infants who died before 36 weeks corrected gestational age

<sup>b</sup> missing observations: BPD, 8; Death before discharge, 13

<sup>c</sup> P < .05 with Bonferroni correction



**Supplementary information Figure 1.** Very preterm infants who received NIV in neonatal units in England and Wales (2010-2017)

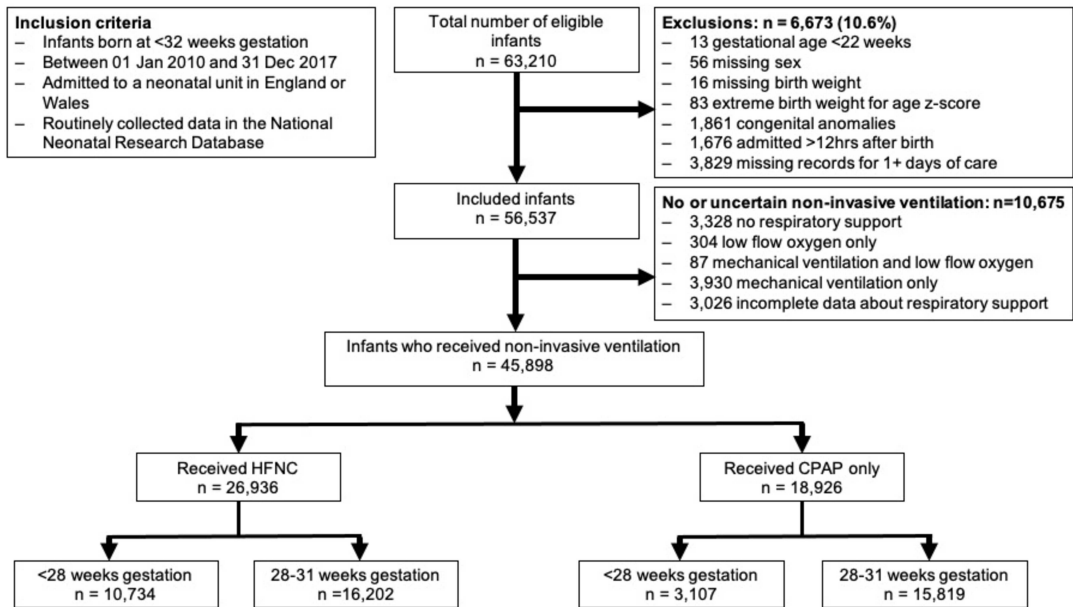

**Supplementary information Figure 2.** Survival curve for infants born at <32 weeks’ who received any NIV during their neonatal care in England and Wales in 2010 to 2017: comparison between those who received HFNC and those who received CPAP

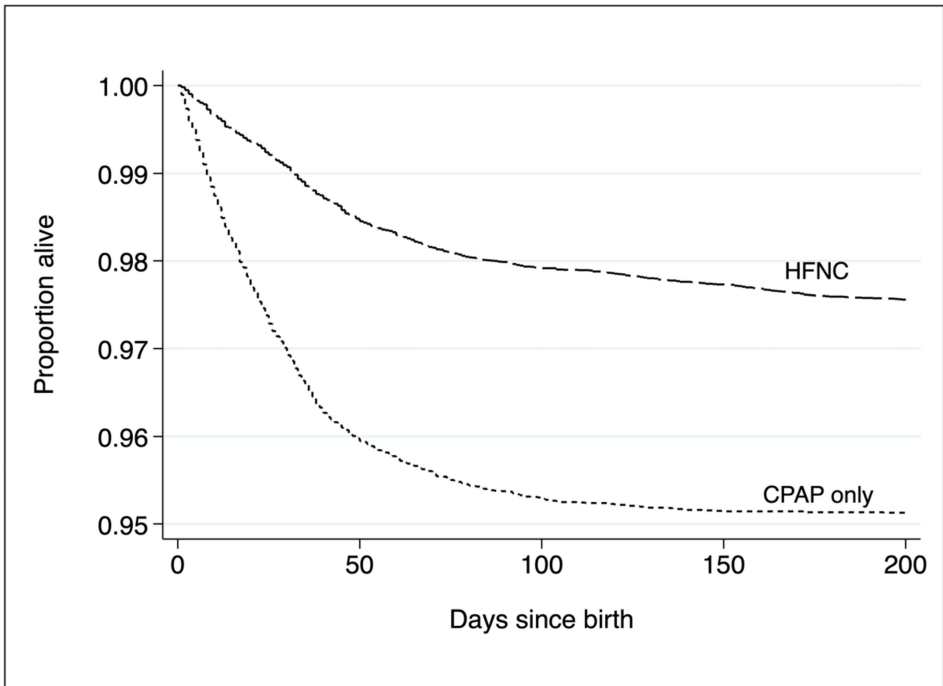

Supplement: archdischild-2021-322390supp001_data_supplement.pdf [file archdischild-2021-322390supp001_data_supplement.pdf]
